# Supplementary material for: The Role of Technology Acceptance, AI Anxiety, and Demographic Factors in Jordanian Healthcare Decision Makers' Attitudes Toward Artificial Intelligence
Source: Research Square preprint supplement (doi:10.21203/rs.3.rs-7338088/v1), 2025-10-10
Supplement: Supplementary file 1 [file a4b59e10f1880f8f1c469556.docx]

**The roles of technology acceptance model, AI anxiety, and demographic factors in behaviors toward artificial intelligence among Jordanian healthcare decision makers.**

The world is undergoing a technological transformation, with notable advancements in Artificial Intelligence (AI). AI encompasses various technologies aiming to enhance human capabilities and improve quality of life. In healthcare, AI applications are rapidly advancing for disease diagnosis and treatment facilitation. Decision-makers in Jordan's healthcare sector are exploring AI's potential role in service enhancement. This survey seeks insights from Jordanian healthcare decision-makers on AI, focusing on factors like technology acceptance and AI anxiety. Demographics may influence their attitudes. Participation in the survey is crucial to understanding the challenges and opportunities AI presents in Jordan's healthcare.

Thank you for your cooperation in this significant research.

**Consent Question:**
Do you agree to participate in this survey under the conditions stated above?

☐ Yes, I consent to participate
☐ No, I do not wish to participate

First: demographic

1. **Age ………………………**
2. **Work sector** (Multiple choice)

- Governmental
- Universities
- Non-Governmental Organization (NGO)
- Private Sector
- Associations

1. **Administrative level** (Single choice)

- Senior management
- Middle management
- Board members
- Executive committee members

General Attitudes towards Artificial Intelligence Scale (GAAIS)

Please indicate the extent to which you agree with each of the statements

| **#** | **Statement** | **Strongly Agree** | **Agree** | **Neutral** | **Disagree** | **Strongly Disagree** |
| --- | --- | --- | --- | --- | --- | --- |
| 1 | For routine transactions, I would rather interact with an artificial intelligence system than a human. | ☐ | ☐ | ☐ | ☐ | ☐ |
| 2 | Artificial intelligence can provide new economic opportunities. | ☐ | ☐ | ☐ | ☐ | ☐ |
| 3 | Organizations use artificial intelligence usefully. | ☐ | ☐ | ☐ | ☐ | ☐ |
| 4 | Artificially intelligent systems can help people make better decisions. | ☐ | ☐ | ☐ | ☐ | ☐ |
| 5 | I am impressed by what artificial intelligence can do. | ☐ | ☐ | ☐ | ☐ | ☐ |
| 6 | I think artificial intelligence systems make life easier. | ☐ | ☐ | ☐ | ☐ | ☐ |
| 7 | I am interested in using artificial intelligence. | ☐ | ☐ | ☐ | ☐ | ☐ |
| 8 | I find artificial intelligence sinister. | ☐ | ☐ | ☐ | ☐ | ☐ |
| 9 | Artificial intelligence might take control over important decisions in my life. | ☐ | ☐ | ☐ | ☐ | ☐ |
| 10 | I think artificial intelligence is dangerous. | ☐ | ☐ | ☐ | ☐ | ☐ |
| 11 | Artificial intelligence can have positive impacts on society. | ☐ | ☐ | ☐ | ☐ | ☐ |
| 12 | Artificial intelligence is exciting. | ☐ | ☐ | ☐ | ☐ | ☐ |
| 13 | An artificially intelligent agent would be useful in my daily life. | ☐ | ☐ | ☐ | ☐ | ☐ |
| 14 | There are many beneficial applications for artificial intelligence. | ☐ | ☐ | ☐ | ☐ | ☐ |
| 15 | I shiver with discomfort when I think about artificial intelligence. | ☐ | ☐ | ☐ | ☐ | ☐ |
| 16 | Artificially intelligent systems can perform tasks better than humans. | ☐ | ☐ | ☐ | ☐ | ☐ |
| 17 | Much of society will benefit from a future with artificial intelligence. | ☐ | ☐ | ☐ | ☐ | ☐ |
| 18 | I would like to use artificial intelligence in my work. | ☐ | ☐ | ☐ | ☐ | ☐ |
| 19 | People like me will suffer if artificial intelligence becomes widespread. | ☐ | ☐ | ☐ | ☐ | ☐ |
| 20 | Artificial intelligence is used to spy on people. | ☐ | ☐ | ☐ | ☐ | ☐ |

Technology Acceptance Model (TAM)

Please indicate the extent to which you agree with each of the following statements (1= Extremely agree and 7=extremely disagree).

| **#** | **Statement** | **1 (Extremely Agree)** | **2** | **3** | **4 (Neutral)** | **5** | **6** | **7 (Extremely Disagree)** |
| --- | --- | --- | --- | --- | --- | --- | --- | --- |
| 1 | Using AI in my job would enable me to accomplish tasks more quickly. | ☐ | ☐ | ☐ | ☐ | ☐ | ☐ | ☐ |
| 2 | Using AI would improve my job performance. | ☐ | ☐ | ☐ | ☐ | ☐ | ☐ | ☐ |
| 3 | Using AI in my job would increase my productivity. | ☐ | ☐ | ☐ | ☐ | ☐ | ☐ | ☐ |
| 4 | Using AI would enhance my effectiveness on the job. | ☐ | ☐ | ☐ | ☐ | ☐ | ☐ | ☐ |
| 5 | Using AI would make it easier to do my job. | ☐ | ☐ | ☐ | ☐ | ☐ | ☐ | ☐ |
| 6 | I would find AI useful in my job. | ☐ | ☐ | ☐ | ☐ | ☐ | ☐ | ☐ |
| 7 | Learning to operate AI would be easy for me. | ☐ | ☐ | ☐ | ☐ | ☐ | ☐ | ☐ |
| 8 | I would like to find AI easy to use. | ☐ | ☐ | ☐ | ☐ | ☐ | ☐ | ☐ |
| 9 | My interaction with AI would be clear and understandable. | ☐ | ☐ | ☐ | ☐ | ☐ | ☐ | ☐ |
| 10 | I would find AI clear and understandable. | ☐ | ☐ | ☐ | ☐ | ☐ | ☐ | ☐ |
| 11 | It would be easy for me to become skillful at using AI. | ☐ | ☐ | ☐ | ☐ | ☐ | ☐ | ☐ |
| 12 | I would find AI easy to use. | ☐ | ☐ | ☐ | ☐ | ☐ | ☐ | ☐ |

AI anxiety scale

For each of the statements, please respond as you deem appropriate

| **#** | **Statement** | **1 (Extremely Agree)** | **2** | **3** | **4 (Neutral)** | **5** | **6** | **7 (Extremely Disagree)** |
| --- | --- | --- | --- | --- | --- | --- | --- | --- |
| 1 | Using AI in my job would enable me to accomplish tasks more quickly. | ☐ | ☐ | ☐ | ☐ | ☐ | ☐ | ☐ |
| 2 | Using AI would improve my job performance. | ☐ | ☐ | ☐ | ☐ | ☐ | ☐ | ☐ |
| 3 | Using AI in my job would increase my productivity. | ☐ | ☐ | ☐ | ☐ | ☐ | ☐ | ☐ |
| 4 | Using AI would enhance my effectiveness on the job. | ☐ | ☐ | ☐ | ☐ | ☐ | ☐ | ☐ |
| 5 | Using AI would make it easier to do my job. | ☐ | ☐ | ☐ | ☐ | ☐ | ☐ | ☐ |
| 6 | I would find AI useful in my job. | ☐ | ☐ | ☐ | ☐ | ☐ | ☐ | ☐ |
| 7 | Learning to operate AI would be easy for me. | ☐ | ☐ | ☐ | ☐ | ☐ | ☐ | ☐ |
| 8 | I would like to find AI easy to use. | ☐ | ☐ | ☐ | ☐ | ☐ | ☐ | ☐ |
| 9 | My interaction with AI would be clear and understandable. | ☐ | ☐ | ☐ | ☐ | ☐ | ☐ | ☐ |
| 10 | I would find AI clear and understandable. | ☐ | ☐ | ☐ | ☐ | ☐ | ☐ | ☐ |
| 11 | It would be easy for me to become skillful at using AI. | ☐ | ☐ | ☐ | ☐ | ☐ | ☐ | ☐ |
| 12 | I would find AI easy to use. | ☐ | ☐ | ☐ | ☐ | ☐ | ☐ | ☐ |
